# Supplementary material
Source: ML conference proceedings conference paper supplement (https://proceedings.mlr.press/v108/chen20c.html)
Supplement: Supplementary file 1 [file chen20c-supp.pdf]

## A Proof of Lemma 1

*Proof.* Using the assumption that  $F$  is  $G$ -Lipschitz continuous, we have

$$|\tilde{F}(x) - \tilde{F}(y)| = |\mathbb{E}_{v \sim B^d}[F(x + \delta v) - F(y + \delta v)]| \quad (15)$$

$$\leq \mathbb{E}_{v \sim B^d}[|F(x + \delta v) - F(y + \delta v)|] \quad (16)$$

$$\leq \mathbb{E}_{v \sim B^d}[G\|(x + \delta v) - (y + \delta v)\|] \quad (17)$$

$$= G\|x - y\|, \quad (18)$$

and

$$|\tilde{F}(x) - F(x)| = |\mathbb{E}_{v \sim B^d}[F(x + \delta v) - F(x)]| \quad (19)$$

$$\leq \mathbb{E}_{v \sim B^d}[|F(x + \delta v) - F(x)|] \quad (20)$$

$$\leq \mathbb{E}_{v \sim B^d}[G\delta\|v\|] \quad (21)$$

$$\leq \delta G. \quad (22)$$

If  $F$  is  $G$ -Lipschitz continuous and monotone continuous DR-submodular, then  $F$  is differentiable. For  $\forall x \leq y$ , we also have

$$\nabla F(x) \geq \nabla F(y), \quad (23)$$

and

$$F(x) \leq F(y). \quad (24)$$

By definition of  $\tilde{F}$ , we have  $\tilde{F}$  is differentiable and for  $\forall x \leq y$ ,

$$\nabla \tilde{F}(x) - \nabla \tilde{F}(y) = \nabla \mathbb{E}_{v \sim B^d}[F(x + \delta v)] - \nabla \mathbb{E}_{v \sim B^d}[F(y + \delta v)] \quad (25)$$

$$= \mathbb{E}_{v \sim B^d}[\nabla F(x + \delta v) - \nabla F(y + \delta v)] \quad (26)$$

$$\geq \mathbb{E}_{v \sim B^d}[0] \quad (27)$$

$$= 0, \quad (28)$$

and

$$\tilde{F}(x) - \tilde{F}(y) = \mathbb{E}_{v \sim B^d}[F(x + \delta v)] - \mathbb{E}_{v \sim B^d}[F(y + \delta v)] \quad (29)$$

$$= \mathbb{E}_{v \sim B^d}[F(x + \delta v) - F(y + \delta v)] \quad (30)$$

$$\leq \mathbb{E}_{v \sim B^d}[0] \quad (31)$$

$$= 0, \quad (32)$$

*i.e.*,  $\nabla \tilde{F}(x) \geq \nabla \tilde{F}(y)$ ,  $\tilde{F}(x) \leq \tilde{F}(y)$ . So  $\tilde{F}$  is also a monotone continuous DR-submodular function.  $\square$

## B Proof of Theorem 1

In order to prove Theorem 1, we need the following variance reduction lemmas [Shamir, 2017, Chen et al., 2018b], where the second one is a slight improvement of Lemma 2 in [Mokhtari et al., 2018a] and Lemma 5 in [Mokhtari et al., 2018b].

**Lemma 4** (Lemma 10 of [Shamir, 2017]). *It holds that*

$$\mathbb{E}_{u \sim S^{d-1}}\left[\frac{d}{2\delta}(F(z + \delta u) - F(z - \delta u))u|z\right] = \nabla \tilde{F}(z), \quad (33)$$

$$\mathbb{E}_{u \sim S^{d-1}}\left[\left\|\frac{d}{2\delta}(F(z + \delta u) - F(z - \delta u))u - \nabla \tilde{F}(z)\right\|^2|z\right] \leq cdG^2, \quad (34)$$

where  $c$  is a constant.

**Lemma 5** (Theorem 3 of [Chen et al., 2018b]). Let  $\{a_t\}_{t=0}^T$  be a sequence of points in  $\mathbb{R}^n$  such that  $\|a_t - a_{t-1}\| \leq G_0/(t+s)$  for all  $1 \leq t \leq T$  with fixed constants  $G_0 \geq 0$  and  $s \geq 3$ . Let  $\{\tilde{a}_t\}_{t=1}^T$  be a sequence of random variables such that  $\mathbb{E}[\tilde{a}_t | \mathcal{F}_{t-1}] = a_t$  and  $\mathbb{E}[\|\tilde{a}_t - a_t\|^2 | \mathcal{F}_{t-1}] \leq \sigma^2$  for every  $t \geq 0$ , where  $\mathcal{F}_{t-1}$  is the  $\sigma$ -field generated by  $\{\tilde{a}_i\}_{i=1}^t$  and  $\mathcal{F}_0 = \emptyset$ . Let  $\{d_t\}_{t=0}^T$  be a sequence of random variables where  $d_0$  is fixed and subsequent  $d_t$  are obtained by the recurrence

$$d_t = (1 - \rho_t)d_{t-1} + \rho_t \tilde{a}_t \quad (35)$$

with  $\rho_t = \frac{2}{(t+s)^{2/3}}$ . Then, we have

$$\mathbb{E}[\|a_t - d_t\|^2] \leq \frac{Q}{(t+s+1)^{2/3}}, \quad (36)$$

where  $Q \triangleq \max\{\|a_0 - d_0\|^2(s+1)^{2/3}, 4\sigma^2 + 3G_0^2/2\}$ .

Now we turn to prove Theorem 1.

*Proof of Theorem 1.* First of all, we note that technically we need the iteration number  $T \geq 4$ , which always holds in practical applications.

Then we show that  $\forall t = 1, \dots, T+1$ ,  $x_t \in \mathcal{D}_\delta$ . By the definition of  $x_t$ , we have  $x_t = \sum_{i=1}^{t-1} \frac{v_i}{T}$ . Since  $v_i$ 's are non-negative vectors, we know that  $x_t$ 's are also non-negative vectors and that  $0 = x_1 \leq x_2 \leq \dots \leq x_{T+1}$ . It suffices to show that  $x_{T+1} \in \mathcal{D}_\delta$ . Since  $x_{T+1}$  is a convex combination of  $v_1, \dots, v_T$  and  $v_t$ 's are in  $\mathcal{D}_\delta$ , we conclude that  $x_{T+1} \in \mathcal{D}_\delta$ . In addition, since  $v_t$ 's are also in  $\mathcal{K} - \delta\mathbf{1}$ ,  $x_{T+1}$  is also in  $\mathcal{K} - \delta\mathbf{1}$ . Therefore our final choice  $x_{T+1} + \delta\mathbf{1}$  resides in the constraint  $\mathcal{K}$ .

Let  $z_t \triangleq x_t + \delta\mathbf{1}$  and the shrunk domain (without translation)  $\mathcal{D}'_\delta \triangleq \mathcal{D}_\delta + \delta\mathbf{1} = \prod_{i=1}^d [\delta, a_i - \delta] \subseteq \mathcal{D}$ . By Jensen's inequality and the fact  $F$  has  $L$ -Lipschitz continuous gradients, we have

$$\|\nabla \tilde{F}(x) - \nabla \tilde{F}(y)\| \leq L\|x - y\|. \quad (37)$$

Thus,

$$\tilde{F}(z_{t+1}) - \tilde{F}(z_t) = \tilde{F}(z_t + \frac{v_t}{T}) - \tilde{F}(z_t) \quad (38)$$

$$\geq \frac{1}{T} \nabla \tilde{F}(z_t)^\top v_t - \frac{L}{2T^2} \|v_t\|^2 \quad (39)$$

$$\geq \frac{1}{T} \nabla \tilde{F}(z_t)^\top v_t - \frac{L}{2T^2} D_1^2 \quad (40)$$

$$= \frac{1}{T} \left( \bar{g}_t^\top v_t + (\nabla \tilde{F}(z_t) - \bar{g}_t)^\top v_t \right) - \frac{L}{2T^2} D_1^2. \quad (41)$$

Let  $x_\delta^* \triangleq \arg \max_{x \in \mathcal{D}'_\delta \cap \mathcal{K}} \tilde{F}(x)$ . Since  $x_\delta^*, z_t \in \mathcal{D}'_\delta$ , we have  $v_t^* \triangleq (x_\delta^* - z_t) \vee 0 \in \mathcal{D}_\delta$ . We know  $z_t + v_t^* = x_\delta^* \vee z_t \in \mathcal{D}'_\delta$  and

$$v_t^* + \delta\mathbf{1} = (x_\delta^* - x_t) \vee \delta\mathbf{1} \leq x_\delta^*. \quad (42)$$

Since we assume that  $F$  is monotone continuous DR-submodular, by Lemma 1,  $\tilde{F}$  is also monotone continuous DR-submodular. As a result,  $\tilde{F}$  is concave along non-negative directions, and  $\nabla \tilde{F}$  is entry-wise non-negative. Thus we have

$$\tilde{F}(z_t + v_t^*) - \tilde{F}(z_t) \leq \nabla \tilde{F}(z_t)^\top v_t^* \quad (43)$$

$$\leq \nabla \tilde{F}(z_t)^\top (x_\delta^* - \delta\mathbf{1}). \quad (44)$$

Since  $x_\delta^* - \delta\mathbf{1} \in \mathcal{K}'$ , we deduce

$$\bar{g}_t^\top v_t \geq \bar{g}_t^\top (x_\delta^* - \delta\mathbf{1}) \quad (45)$$

$$= \nabla \tilde{F}(z_t)^\top (x_\delta^* - \delta\mathbf{1}) + (\bar{g}_t - \nabla \tilde{F}(z_t))^\top (x_\delta^* - \delta\mathbf{1}) \quad (46)$$

$$\geq \tilde{F}(z_t + v_t^*) - \tilde{F}(z_t) + (\bar{g}_t - \nabla \tilde{F}(z_t))^\top (x_\delta^* - \delta\mathbf{1}) \quad (47)$$

$$\geq \tilde{F}(x_\delta^*) - \tilde{F}(z_t) + (\bar{g}_t - \nabla \tilde{F}(z_t))^\top (x_\delta^* - \delta\mathbf{1}). \quad (48)$$

Therefore, we obtain

$$\bar{g}_t^\top v_t + (\nabla \tilde{F}(z_t) - \bar{g}_t)^\top v_t \geq \tilde{F}(x_\delta^*) - \tilde{F}(z_t) + (\nabla \tilde{F}(z_t) - \bar{g}_t)^\top (v_t - (x_\delta^* - \delta \mathbf{1})). \quad (49)$$

By plugging Eq. (49) into Eq. (41), after re-arrangement of the terms, we obtain

$$h_{t+1} \leq (1 - \frac{1}{T})h_t + \frac{1}{T}(\nabla \tilde{F}(z_t) - \bar{g}_t)^\top ((x_\delta^* - \delta \mathbf{1}) - v_t) + \frac{L}{2T^2}D_1^2, \quad (50)$$

where  $h_t \triangleq \tilde{F}(x_\delta^*) - \tilde{F}(z_t)$ . Next we derive an upper bound for  $(\nabla \tilde{F}(z_t) - \bar{g}_t)^\top ((x_\delta^* - \delta \mathbf{1}) - v_t)$ . By Young's inequality, it can be deduced that for any  $\beta_t > 0$ ,

$$(\nabla \tilde{F}(z_t) - \bar{g}_t)^\top ((x_\delta^* - \delta \mathbf{1}) - v_t) \leq \frac{\beta_t}{2} \|\nabla \tilde{F}(z_t) - \bar{g}_t\|^2 + \frac{1}{2\beta_t} \|(x_\delta^* - \delta \mathbf{1}) - v_t\|^2 \quad (51)$$

$$\leq \frac{\beta_t}{2} \|\nabla \tilde{F}(z_t) - \bar{g}_t\|^2 + \frac{1}{2\beta_t} D_1^2. \quad (52)$$

Now let  $\mathcal{F}_1 \triangleq \emptyset$  and  $\mathcal{F}_t$  be the  $\sigma$ -field generate by  $\{\bar{g}_1, \dots, \bar{g}_{t-1}\}$ , then by Lemma 4, we have

$$\mathbb{E}\left[\frac{d}{2\delta}(F(y_{t,i}^+) - F(y_{t,i}^-))u_{t,i} | \mathcal{F}_{t-1}\right] = \nabla \tilde{F}(z_t), \quad (53)$$

and

$$\mathbb{E}\left[\left\|\frac{d}{2\delta}(F(y_{t,i}^+) - F(y_{t,i}^-))u_{t,i} - \nabla \tilde{F}(z_t)\right\|^2 | \mathcal{F}_{t-1}\right] \leq cdG^2. \quad (54)$$

Therefore,

$$\mathbb{E}[g_t | \mathcal{F}_{t-1}] = \mathbb{E}\left[\frac{1}{B_t} \sum_{i=1}^{B_t} \frac{d}{2\delta}(F(y_{t,i}^+) - F(y_{t,i}^-))u_{t,i} | \mathcal{F}_{t-1}\right] \quad (55)$$

$$= \nabla \tilde{F}(z_t), \quad (56)$$

and

$$\mathbb{E}[\|g_t - \nabla \tilde{F}(z_t)\|^2 | \mathcal{F}_{t-1}] = \frac{1}{B_t^2} \sum_{i=1}^{B_t} \mathbb{E}\left[\left\|\frac{d}{2\delta}(F(y_{t,i}^+) - F(y_{t,i}^-))u_{t,i} - \nabla \tilde{F}(z_t)\right\|^2 | \mathcal{F}_{t-1}\right] \quad (57)$$

$$\leq \frac{cdG^2}{B_t}. \quad (58)$$

By Jensen's inequality and the assumption  $F$  is  $L$ -smooth, we have

$$\|\nabla \tilde{F}(z_t) - \nabla \tilde{F}(z_{t-1})\| \leq L \frac{D_1}{T} \leq \frac{2LD_1}{t+3}. \quad (59)$$

Then by Lemma 5 with  $s = 3$ ,  $d_t = \bar{g}_t$ ,  $\forall t \geq 0$ ,  $\tilde{a}_t = g_t$ ,  $a_t = \nabla \tilde{F}(z_t)$ ,  $\forall t \geq 1$ ,  $a_0 = \nabla \tilde{F}(z_1)$ ,  $G_0 = 2LD_1$ , we have

$$\mathbb{E}[\|\nabla \tilde{F}(z_t) - \bar{g}_t\|^2] \leq \frac{Q}{(t+4)^{2/3}}, \quad (60)$$

where  $Q \triangleq \max\{\|\nabla \tilde{F}(x_1 + \delta \mathbf{1})\|^2 4^{2/3}, \frac{4cdG^2}{B_t} + 6L^2D_1^2\}$ . Note that by Lemma 1, we have  $\|\nabla \tilde{F}(x)\| \leq G$ , thus we can re-define  $Q = \max\{4^{2/3}G^2, \frac{4cdG^2}{B_t} + 6L^2D_1^2\}$ .

Using Eqs. (50), (52) and (60) and taking expectation, we obtain

$$\mathbb{E}[h_{t+1}] \leq (1 - \frac{1}{T})\mathbb{E}[h_t] + \frac{1}{T} \left( \frac{\beta_t}{2} \cdot \frac{Q}{(t+4)^{2/3}} + \frac{D_1^2}{2\beta_t} \right) + \frac{L}{2T^2}D_1^2 \leq (1 - \frac{1}{T})\mathbb{E}[h_t] + \frac{D_1Q^{1/2}}{T(t+4)^{1/3}} + \frac{L}{2T^2}D_1^2, \quad (61)$$

where we set  $\beta_t = \frac{D_1(t+4)^{1/3}}{Q^{1/2}}$ . Using the above inequality recursively, we have

$$\mathbb{E}[h_{T+1}] \leq (1 - \frac{1}{T})^T (\tilde{F}(x_\delta^*) - \tilde{F}(\delta \mathbf{1})) + \sum_{t=1}^T \frac{D_1 Q^{1/2}}{T(t+4)^{1/3}} + \frac{L}{2T} D_1^2 \quad (62)$$

$$\leq e^{-1} (\tilde{F}(x_\delta^*) - \tilde{F}(\delta \mathbf{1})) + \frac{D_1 Q^{1/2}}{T} \int_0^T \frac{dx}{(x+4)^{1/3}} + \frac{L}{2T} D_1^2 \quad (63)$$

$$\leq e^{-1} (\tilde{F}(x_\delta^*) - \tilde{F}(\delta \mathbf{1})) + \frac{D_1 Q^{1/2}}{T} \frac{3}{2} (T+4)^{2/3} + \frac{L}{2T} D_1^2 \quad (64)$$

$$\leq e^{-1} (\tilde{F}(x_\delta^*) - \tilde{F}(\delta \mathbf{1})) + \frac{D_1 Q^{1/2}}{T} \frac{3}{2} (2T)^{2/3} + \frac{L}{2T} D_1^2 \quad (65)$$

$$\leq e^{-1} (\tilde{F}(x_\delta^*) - \tilde{F}(\delta \mathbf{1})) + \frac{3D_1 Q^{1/2}}{T^{1/3}} + \frac{LD_1^2}{2T}. \quad (66)$$

By re-arranging the terms, we conclude

$$(1 - \frac{1}{e}) \tilde{F}(x_\delta^*) - \mathbb{E}[\tilde{F}(z_{T+1})] \leq -e^{-1} \tilde{F}(\delta \mathbf{1}) + \frac{3D_1 Q^{1/2}}{T^{1/3}} + \frac{LD_1^2}{2T} \quad (67)$$

$$\leq \frac{3D_1 Q^{1/2}}{T^{1/3}} + \frac{LD_1^2}{2T}, \quad (68)$$

where the second inequality holds since the image of  $F$  is in  $\mathbb{R}_+$ .

By Lemma 1, we have  $\tilde{F}(z_{T+1}) \leq F(z_{T+1}) + \delta G$  and

$$\tilde{F}(x_\delta^*) \geq \tilde{F}(x^*) - \delta G \sqrt{d} \geq F(x^*) - \delta G(\sqrt{d} + 1). \quad (69)$$

Therefore,

$$(1 - \frac{1}{e}) F(x^*) - \mathbb{E}[F(z_{T+1})] \leq \frac{3D_1 Q^{1/2}}{T^{1/3}} + \frac{LD_1^2}{2T} + \delta G(1 + (\sqrt{d} + 1)(1 - \frac{1}{e})). \quad (70)$$

□

## C Proof of Theorem 2

*Proof.* By the unbiasedness of  $\hat{F}$  and Lemma 4, we have

$$\mathbb{E}[\frac{d}{2\delta} (\hat{F}(y_{t,i}^+) - \hat{F}(y_{t,i}^-)) u_{t,i} | \mathcal{F}_{t-1}] = \mathbb{E}[\mathbb{E}[\frac{d}{2\delta} (\hat{F}(y_{t,i}^+) - \hat{F}(y_{t,i}^-)) u_{t,i} | \mathcal{F}_{t-1}, u_{t,i}] | \mathcal{F}_{t-1}] \quad (71)$$

$$= \mathbb{E}[\frac{d}{2\delta} (F(y_{t,i}^+) - F(y_{t,i}^-)) u_{t,i} | \mathcal{F}_{t-1}] \quad (72)$$

$$= \nabla \tilde{F}(z_t), \quad (73)$$

where  $z_t = x_t + \delta \mathbf{1}$ , and

$$\mathbb{E}[\|\frac{d}{2\delta}(\hat{F}(y_{t,i}^+) - \hat{F}(y_{t,i}^-))u_{t,i} - \nabla \tilde{F}(z_t)\|^2 | \mathcal{F}_{t-1}] \quad (74)$$

$$= \mathbb{E}[\mathbb{E}[\|\frac{d}{2\delta}(F(y_{t,i}^+) - F(y_{t,i}^-))u_{t,i} - \nabla \tilde{F}(z_t)\|^2 | \mathcal{F}_{t-1}]] \quad (75)$$

$$+ \frac{d}{2\delta}(\hat{F}(y_{t,i}^+) - F(y_{t,i}^+))u_{t,i} \quad (76)$$

$$- \frac{d}{2\delta}(\hat{F}(y_{t,i}^-) - F(y_{t,i}^-))u_{t,i} \|^2 | \mathcal{F}_{t-1}, u_{t,i} | \mathcal{F}_{t-1}] \quad (77)$$

$$= \mathbb{E}[\mathbb{E}[\|\frac{d}{2\delta}(F(y_{t,i}^+) - F(y_{t,i}^-))u_{t,i} - \nabla \tilde{F}(z_t)\|^2 | \mathcal{F}_{t-1}, u_{t,i} | \mathcal{F}_{t-1}]] \quad (78)$$

$$+ \mathbb{E}[\mathbb{E}[\|\frac{d}{2\delta}(\hat{F}(y_{t,i}^+) - F(y_{t,i}^+))u_{t,i}\|^2 | \mathcal{F}_{t-1}, u_{t,i} | \mathcal{F}_{t-1}]] \quad (79)$$

$$+ \mathbb{E}[\mathbb{E}[\|\frac{d}{2\delta}(\hat{F}(y_{t,i}^-) - F(y_{t,i}^-))u_{t,i}\|^2 | \mathcal{F}_{t-1}, u_{t,i} | \mathcal{F}_{t-1}]] \quad (80)$$

$$\leq \mathbb{E}[\|\frac{d}{2\delta}(F(y_{t,i}^+) - F(y_{t,i}^-))u_{t,i} - \nabla \tilde{F}(z_t)\|^2 | \mathcal{F}_{t-1}] \quad (81)$$

$$+ \frac{d^2}{4\delta^2} \mathbb{E}[\mathbb{E}[\|\hat{F}(y_{t,i}^+) - F(y_{t,i}^+)\|^2 \cdot \|u_{t,i}\|^2 | \mathcal{F}_{t-1}, u_{t,i} | \mathcal{F}_{t-1}]] \quad (82)$$

$$+ \frac{d^2}{4\delta^2} \mathbb{E}[\mathbb{E}[\|\hat{F}(y_{t,i}^-) - F(y_{t,i}^-)\|^2 \cdot \|u_{t,i}\|^2 | \mathcal{F}_{t-1}, u_{t,i} | \mathcal{F}_{t-1}]] \quad (83)$$

$$\leq cdG^2 + \frac{d^2}{4\delta^2} \sigma_0^2 + \frac{d^2}{4\delta^2} \sigma_0^2 \quad (84)$$

$$= cdG^2 + \frac{d^2}{2\delta^2} \sigma_0^2. \quad (85)$$

Then we have

$$\mathbb{E}[g_t | \mathcal{F}_{t-1}] = \mathbb{E}[\frac{1}{B_t} \sum_{i=1}^{B_t} \frac{d}{2\delta} (\hat{F}(y_{t,i}^+) - \hat{F}(y_{t,i}^-))u_{t,i} | \mathcal{F}_{t-1}] \quad (86)$$

$$= \nabla \tilde{F}(z_t), \quad (87)$$

and

$$\mathbb{E}[\|g_t - \nabla \tilde{F}(z_t)\|^2 | \mathcal{F}_{t-1}] = \frac{1}{B_t^2} \sum_{i=1}^{B_t} \mathbb{E}[\|\frac{d}{2\delta} (\hat{F}(y_{t,i}^+) - \hat{F}(y_{t,i}^-))u_{t,i} - \nabla \tilde{F}(z_t)\|^2 | \mathcal{F}_{t-1}] \quad (88)$$

$$\leq \frac{cdG^2 + \frac{d^2}{2\delta^2} \sigma_0^2}{B_t}. \quad (89)$$

Similar to the proof of Theorem 1, we have

$$\mathbb{E}[\|\nabla \tilde{F}(z_t) - \bar{g}_t\|^2] \leq \frac{Q}{(t+4)^{2/3}}, \quad (90)$$

where  $Q = \max\{4^{2/3}G^2, 6L^2D_1^2 + \frac{4cdG^2 + 2d^2\sigma_0^2/\delta^2}{B_t}\}$ . Thus we conclude

$$(1 - \frac{1}{e})F(x^*) - \mathbb{E}[F(z_{T+1})] \leq \frac{3D_1Q^{1/2}}{T^{1/3}} + \frac{LD_1^2}{2T} + \delta G(1 + (\sqrt{d} + 1)(1 - \frac{1}{e})). \quad (91)$$

□

## D Proof of Lemma 3

*Proof.* Recall that  $F(x) = \mathbb{E}_{X \sim x}[f(X)] = \sum_{S \subseteq \Omega} f(S) \prod_{i \in S} x_i \prod_{j \notin S} (1 - x_j)$ , then for any fixed  $i \in [d]$ , where  $d = |\Omega|$ , we have

$$\left| \frac{\partial F(x)}{\partial x_i} \right| = \left| \sum_{\substack{S \subseteq \Omega \\ i \in S}} f(S) \prod_{\substack{j \in S \\ j \neq i}} x_j \prod_{\substack{k \notin S \\ k \neq i}} (1 - x_k) - \sum_{\substack{S \subseteq \Omega \\ i \notin S}} f(S) \prod_{\substack{j \in S \\ j \neq i}} x_j \prod_{\substack{k \notin S \\ k \neq i}} (1 - x_k) \right| \quad (92)$$

$$\leq M \left[ \sum_{\substack{S \subseteq \Omega \\ i \in S}} \prod_{\substack{j \in S \\ j \neq i}} x_j \prod_{\substack{k \notin S \\ k \neq i}} (1 - x_k) + \sum_{\substack{S \subseteq \Omega \\ i \notin S}} \prod_{\substack{j \in S \\ j \neq i}} x_j \prod_{\substack{k \notin S \\ k \neq i}} (1 - x_k) \right] \quad (93)$$

$$= 2M. \quad (94)$$

So we have

$$\|\nabla F(x)\| \leq 2M\sqrt{d}. \quad (95)$$

Then  $F$  is  $2M\sqrt{d}$ -Lipschitz.

Now we turn to prove that  $F$  has Lipschitz continuous gradients. Thanks to the multilinearity, we have

$$\frac{\partial F}{\partial x_i} = F(x|x_i = 1) - F(x|x_i = 0). \quad (96)$$

Since

$$F(x|x_i = 1) = \sum_{\substack{S \subseteq \Omega \\ i \in S}} f(S) \prod_{\substack{j \in S \\ j \neq i}} x_j \prod_{\substack{k \notin S \\ k \neq i}} (1 - x_k), \quad (97)$$

we have

$$\frac{\partial F(x|x_i = 1)}{\partial x_i} = 0, \quad (98)$$

and for any fixed  $j \neq i$ ,

$$\left| \frac{\partial F(x|x_i = 1)}{\partial x_j} \right| = \left| \sum_{\substack{S \subseteq \Omega \\ i, j \in S}} f(S) \prod_{\substack{l \in S \\ l \notin \{i, j\}}} x_l \prod_{\substack{k \notin S \\ k \notin \{i, j\}}} (1 - x_k) - \sum_{\substack{S \subseteq \Omega \\ i \in S, j \notin S}} f(S) \prod_{\substack{l \in S \\ l \notin \{i, j\}}} x_l \prod_{\substack{k \notin S \\ k \notin \{i, j\}}} (1 - x_k) \right| \quad (99)$$

$$\leq M \left[ \sum_{\substack{S \subseteq \Omega \\ i, j \in S}} \prod_{\substack{l \in S \\ l \notin \{i, j\}}} x_l \prod_{\substack{k \notin S \\ k \notin \{i, j\}}} (1 - x_k) + \sum_{\substack{S \subseteq \Omega \\ i \in S, j \notin S}} \prod_{\substack{l \in S \\ l \notin \{i, j\}}} x_l \prod_{\substack{k \notin S \\ k \notin \{i, j\}}} (1 - x_k) \right] \quad (100)$$

$$= 2M. \quad (101)$$

Similarly, we have  $\frac{\partial F(x|x_i=0)}{\partial x_i} = 0$ , and  $\left| \frac{\partial F(x|x_i=0)}{\partial x_j} \right| \leq 2M$  for  $j \neq i$ . So we conclude that

$$\left| \frac{\partial^2 F}{\partial x_j \partial x_i} \right| \leq \begin{cases} 0, & \text{if } j = i, \\ 4M, & \text{if } j \neq i. \end{cases} \quad (102)$$

Then  $\|\nabla \frac{\partial F}{\partial x_i}\| \leq 4M\sqrt{d-1}$ , i.e.,  $\frac{\partial F}{\partial x_i}$  is  $4M\sqrt{d-1}$ -Lipschitz.

Then we deduce that

$$\|\nabla F(z_1) - \nabla F(z_2)\| = \left[ \sum_{i=1}^d \left( \frac{\partial F(z_1)}{\partial x_i} - \frac{\partial F(z_2)}{\partial x_i} \right)^2 \right]^{1/2} \quad (103)$$

$$\leq \left[ \sum_{i=1}^d (4M\sqrt{d-1})^2 \|z_1 - z_2\|^2 \right]^{1/2} \quad (104)$$

$$= \sqrt{\sum_{i=1}^d (4M\sqrt{d-1})^2} \cdot \|z_1 - z_2\| \quad (105)$$

$$= 4M\sqrt{d(d-1)} \|z_1 - z_2\|. \quad (106)$$

So  $F$  is  $4M\sqrt{d(d-1)}$ -smooth.  $\square$

## E Proof of Theorem 3

*Proof.* Recall that we define  $z_t = x_t + \delta \mathbf{1}$ . Then we have

$$\mathbb{E}[\|g_t - \nabla \tilde{F}(z_t)\|^2 | \mathcal{F}_{t-1}] = \frac{1}{B_t^2} \sum_{i=1}^{B_t} \mathbb{E}[\| \frac{d}{2\delta} (\bar{f}_{t,i}^+ - \bar{f}_{t,i}^-) u_{t,i} - \nabla \tilde{F}(z_t) \|^2 | \mathcal{F}_{t-1}] \quad (107)$$

$$= \frac{1}{B_t^2} \sum_{i=1}^{B_t} \mathbb{E}[\| \frac{d}{2\delta} (F(y_{t,i}^+) - F(y_{t,i}^-)) u_{t,i} - \nabla \tilde{F}(z_t) \|^2 | \mathcal{F}_{t-1}] \quad (108)$$

$$+ \frac{d}{2\delta} [\bar{f}_{t,i}^+ - F(y_{t,i}^+)] u_{t,i} - \frac{d}{2\delta} [\bar{f}_{t,i}^- - F(y_{t,i}^-)] u_{t,i} \|^2 | \mathcal{F}_{t-1}] \quad (109)$$

$$= \frac{1}{B_t^2} \sum_{i=1}^{B_t} \mathbb{E}[\| \frac{d}{2\delta} (F(y_{t,i}^+) - F(y_{t,i}^-)) u_{t,i} - \nabla \tilde{F}(z_t) \|^2 | \mathcal{F}_{t-1}] \quad (110)$$

$$+ \frac{1}{B_t^2} \sum_{i=1}^{B_t} \mathbb{E}[\| \frac{d}{2\delta} [\bar{f}_{t,i}^+ - F(y_{t,i}^+)] \|^2 | \mathcal{F}_{t-1}] \quad (111)$$

$$+ \frac{1}{B_t^2} \sum_{i=1}^{B_t} \mathbb{E}[\| \frac{d}{2\delta} [\bar{f}_{t,i}^- - F(y_{t,i}^-)] \|^2 | \mathcal{F}_{t-1}], \quad (112)$$

where we used the independence of  $\bar{f}_{t,i}^\pm$  and the facts that  $\mathbb{E}[\bar{f}_{t,i}^\pm] = F(y_{t,i}^\pm)$ ,  $\mathbb{E}[\frac{d}{2\delta} (F(y_{t,i}^+) - F(y_{t,i}^-)) u_{t,i}] = \nabla \tilde{F}(z_t)$ .

Then same to Eq. (58) and by Lemma 3, the first item is no more than  $\frac{4cd^2M^2}{B_i}$ . To upper bound the last two items, we have for every  $i \in [B_t]$ ,

$$\begin{aligned} \mathbb{E}[\| \frac{d}{2\delta} [\bar{f}_{t,i}^+ - F(y_{t,i}^+)] \|^2 | \mathcal{F}_{t-1}] &= \frac{d^2}{4\delta^2} \mathbb{E}[\| \sum_{j=1}^l [f(Y_{t,i,j}^+) - F(y_{t,i}^+)] \|^2 | \mathcal{F}_{t-1}] \\ &\leq \frac{d^2}{4\delta^2} \cdot l \cdot \frac{M^2}{l^2} \\ &= \frac{d^2 M^2}{4l\delta^2}. \end{aligned} \quad (113)$$

Similarly, we have

$$\mathbb{E}[\| \frac{d}{2\delta} [\bar{f}_{t,i}^- - F(y_{t,i}^-)] \|^2 | \mathcal{F}_{t-1}] \leq \frac{d^2 M^2}{4l\delta^2}. \quad (114)$$

As a result, we have

$$\begin{aligned} \mathbb{E}[\|g_t - \nabla \tilde{F}(z_t)\|^2 | \mathcal{F}_{t-1}] &\leq \frac{4cd^2M^2}{B_t} + \frac{1}{B_t^2} \cdot B_t \cdot \frac{d^2M^2}{4l\delta^2} + \frac{1}{B_t^2} \cdot B_t \cdot \frac{d^2M^2}{4l\delta^2} \\ &= \frac{4cd^2M^2}{B_t} + \frac{d^2M^2}{2B_t l \delta^2}. \end{aligned} \quad (115)$$

Then same to the proof for Theorem 1, we have

$$(1 - \frac{1}{e})F(x^*) - \mathbb{E}[F(z_{T+1})] \leq \frac{3D_1Q^{1/2}}{T^{1/3}} + \frac{2M\sqrt{d(d-1)}D_1^2}{T} + 2M\delta\sqrt{d}(1 + (\sqrt{d} + 1)(1 - \frac{1}{e})). \quad (116)$$

where  $D_1 \triangleq \text{diam}(\mathcal{K}')$ ,  $Q = \max\{4^{5/3}dM^2, \frac{2d^2M^2(8c + \frac{1}{l\delta^2})}{B_t} + 96d(d-1)M^2D_1^2\}$ ,  $x^*$  is the global maximizer of  $F$  on  $\mathcal{K}$ .

Note that since the rounding scheme is lossless, we have

$$(1 - \frac{1}{e})f(X^*) - \mathbb{E}[f(X_{T+1})] \leq (1 - \frac{1}{e})F(x^*) - \mathbb{E}[F(z_{T+1})]. \quad (117)$$

Combine Eqs. (116) and (117), we have

$$(1 - \frac{1}{e})f(X^*) - \mathbb{E}[f(X_{T+1})] \leq \frac{3D_1Q^{1/2}}{T^{1/3}} + \frac{2M\sqrt{d(d-1)}D_1^2}{T} + 2M\delta\sqrt{d}(1 + (\sqrt{d} + 1)(1 - \frac{1}{e})). \quad (118)$$

□
